# Supplementary material for: Sulfur-doped Fe–Cu–La trimetallic oxides as a novel magnetic adsorbent for efficient removal of As(iii) and As(v) from aqueous solution
Source: Royal Society of Chemistry journal article supplement (doi:10.1039/d1ew00330e), 2021-01-01
Supplement: d1ew00330e1.pdf [file d1ew00330e1.pdf]

Supporting information for “Sulfur-doped Fe-Cu-La trimetallic  
oxides as a novel magnetic adsorbent for efficient removal of As(III) and  
As(V) from aqueous solution”

Baoxia Liu<sup>1</sup>, Haiyan Liu<sup>1</sup>, Wei Li<sup>2</sup>, Yuxin Li<sup>3</sup>, Yeqing Lan<sup>1</sup>, Ying Li<sup>1\*</sup>

<sup>1</sup>College of Sciences, Nanjing Agricultural University, Nanjing 210095, P.R. China.

<sup>2</sup>Technology Center, China Tobacco Jiangsu Industrial Co., Ltd., Nanjing 210019,  
China.

<sup>3</sup>College of Resources and Environmental Sciences, Nanjing Agricultural University,  
Nanjing 210095, P.R. China.

Text S1

All reagents were of analytical grade and used without further purification.  $\text{LaCl}_3 \cdot 7\text{H}_2\text{O}$  was obtained from Shanghai Macklin Biochemical Co., Ltd (China). Thiourea ( $\text{H}_2\text{NCSNH}_2$ ) as sulfur source was purchased from Xilong Chemical Co., Ltd (Guangdong, China).  $\text{NaAsO}_2$  and  $\text{Na}_2\text{HAsO}_4 \cdot 7\text{H}_2\text{O}$  were purchased from Sigma-Aldrich (USA).  $\text{FeSO}_4 \cdot 7\text{H}_2\text{O}$  and  $\text{FeCl}_3 \cdot 6\text{H}_2\text{O}$  were obtained from Sinopharm Chemical Reagent Co., Ltd. (China) and Chengdu Chron Chemicals Co., Ltd. (China), respectively.  $\text{CuCl}_2 \cdot 2\text{H}_2\text{O}$  was supplied from Tianjin Kemiou Chemical Reagent Co., Ltd. Hydrazine hydrate ( $\text{N}_2\text{H}_4 \cdot \text{H}_2\text{O}$ ) was obtained from Nanjing Chemical Reagent Co., Ltd. (China). Ammonia ( $\text{NH}_3 \cdot \text{H}_2\text{O}$ ) and polyethylene Glycol (PEG) 6000 were bought from Guangdong Guanghua Technology Co. Ltd. (China). Humic acid (HA) ( $\geq 90\%$ ), tertbutyl alcohol (TBA) and p-benzoquinone (BQ) were purchased from

Aladdin Inc. (Shanghai, China).

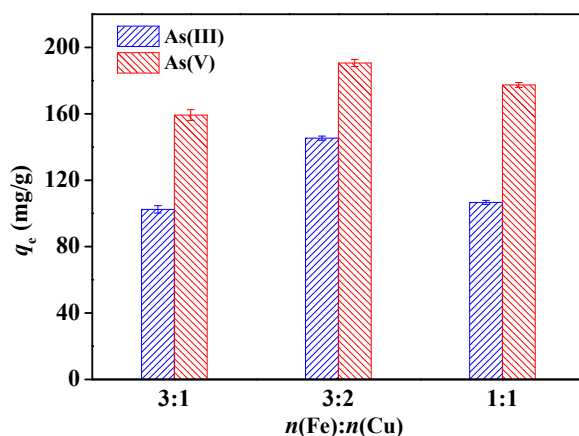

Fig. S1 Effect of different molar ratios of iron and copper on the adsorption of As(III) and As(V). Adsorbent dose = 0.2 g/L,  $c(\text{As})_0 = 50$  mg/L, Initial solution pH = 6.0,  $T = 25^\circ\text{C}$ .

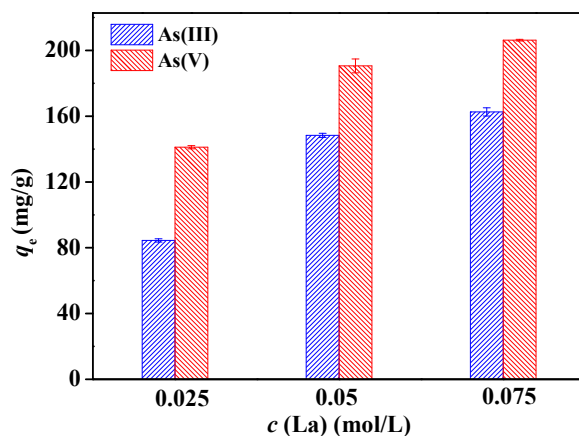

Fig. S2 Effect of lanthanum concentrations of on the adsorption of As(III) and As(V). Adsorbent dose = 0.2 g/L,  $c(\text{As})_0 = 50$  mg/L, Initial solution pH = 6.0,  $T = 25^\circ\text{C}$ .

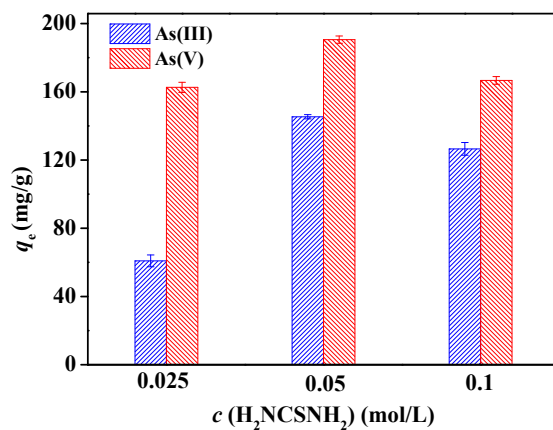

Fig. S3 Effect of thiourea concentrations on the adsorption of As(III) and As(V). Adsorbent dose = 0.2 g/L,  $c(\text{As})_0 = 50$  mg/L, Initial solution pH = 6.0,  $T = 25^\circ\text{C}$ .

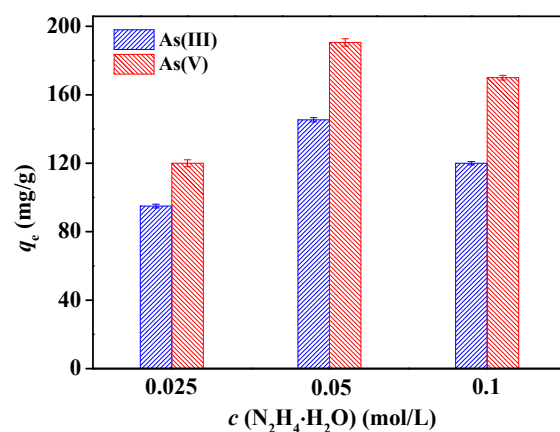

Fig. S4 Effect of hydrazine hydrate concentrations on the adsorption of As(III) and As(V). Adsorbent dose = 0.2 g/L,  $c(\text{As})_0 = 50$  mg/L, Initial solution pH = 6.0,  $T = 25^\circ\text{C}$ .

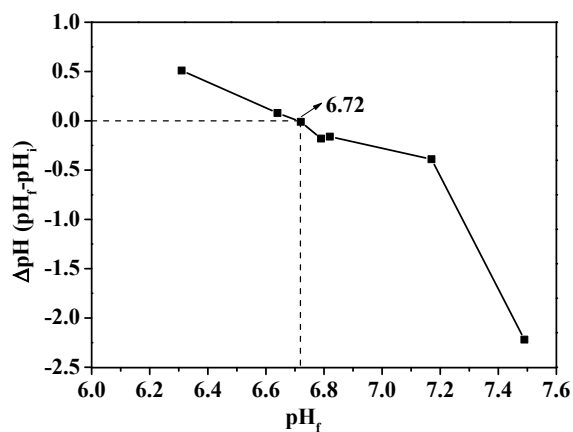

Fig. S5 The point of zero charge (PZC) of S-FeCuLaO.

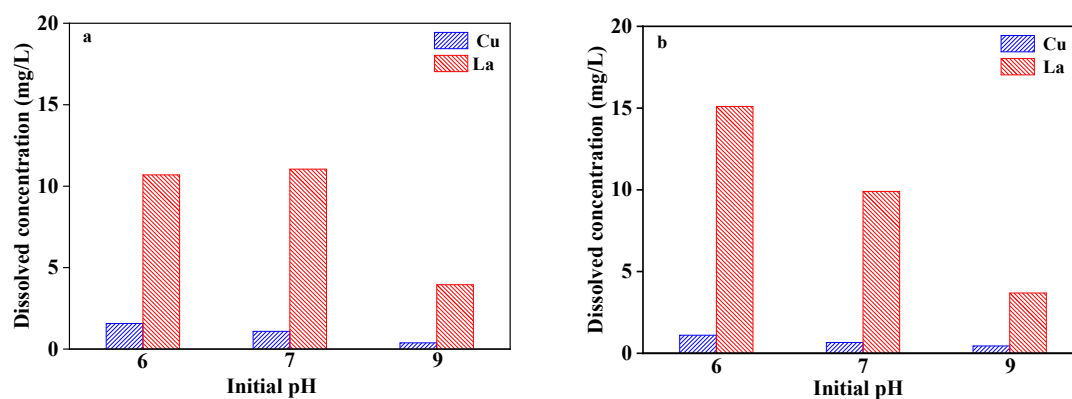

Fig. S6 The concentrations of Cu and La ions leaching from S-FeCuLaO after the adsorption of As(III) (a) and As(V) (b) adsorption. Adsorbent dose = 0.2 g/L,  $c(\text{As})_0 = 10$  mg/L,  $T = 25^\circ\text{C}$ .

Table S1 Main parameters of the well water from Hangzhou, China

| Items                   | Value        | Items                                | Value        |
|-------------------------|--------------|--------------------------------------|--------------|
| TOC (mg/L)              | 2.04         | Cl <sup>-</sup> (mg/L)               | 28.34        |
| pH                      | 6.66         | NO <sub>3</sub> <sup>-</sup> (mg/L)  | 34.87        |
| Ca <sup>2+</sup> (mg/L) | 23.31        | SO <sub>4</sub> <sup>2-</sup> (mg/L) | 8.35         |
| Mg <sup>2+</sup> (mg/L) | 4.18         | PO <sub>4</sub> <sup>3-</sup> (mg/L) | Not detected |
| As (mg/L)               | Not detected |                                      |              |
